# Supplementary material
Source: Royal Society of Chemistry journal article supplement (doi:10.1039/d5tb02687c)
Supplement: d5tb02687c1.pdf [file d5tb02687c1.pdf]

## H<sub>2</sub>O<sub>2</sub> Responsive Rhodamine-Based Probe for Monitoring Early-Stage Diabetes Diagnosis

Moumita Mondal,<sup>a, b</sup> Pravat Ghorai,<sup>a</sup> Asmita Samadder,<sup>c</sup> Stefan A. Freunberger,<sup>\*d</sup> Priyabrata Banerjee <sup>\*a, b</sup>

a. Electric Mobility & Tribology Research Group, CSIR-Central Mechanical Engineering Research Institute, Mahatma Gandhi Avenue, Durgapur, 713209, India, E-mail: pbanerjee.cmeri@csir.res.in, priyabratbanerjee.chem@gmail.com; Tel: +91-9433814081

b. Academy of Scientific & Innovative Research (AcSIR), Ghaziabad-201002, Uttar Pradesh, India

c. Cytogenetics and Molecular Biology Laboratory, Department of Zoology, University of Kalyani, Kalyani, Nadia-741235, India

d. Institute of Science and Technology Austria (ISTA), Am Campus 1, 3400 Klosterneuburg, Austria, E-mail: Stefan.Freunberger@ist.ac.at

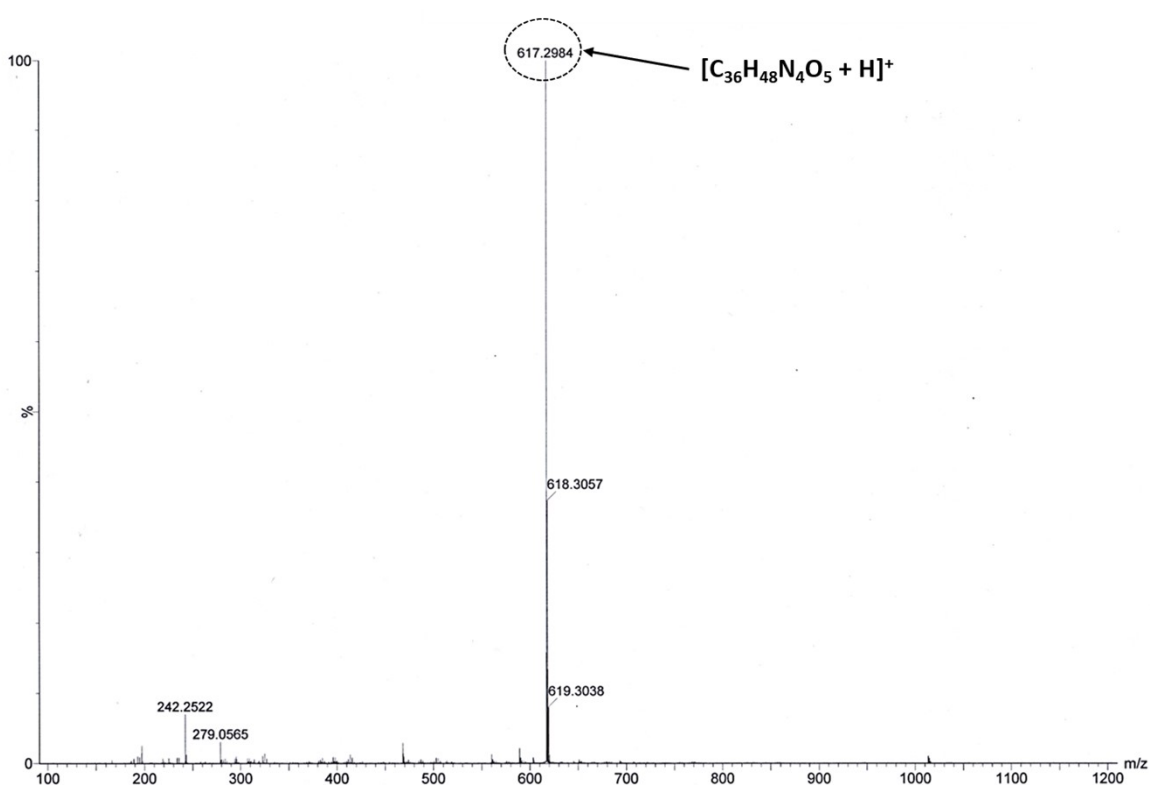

**Figure S1:** ESI-MS spectrum of the synthesized sensory probe RN.

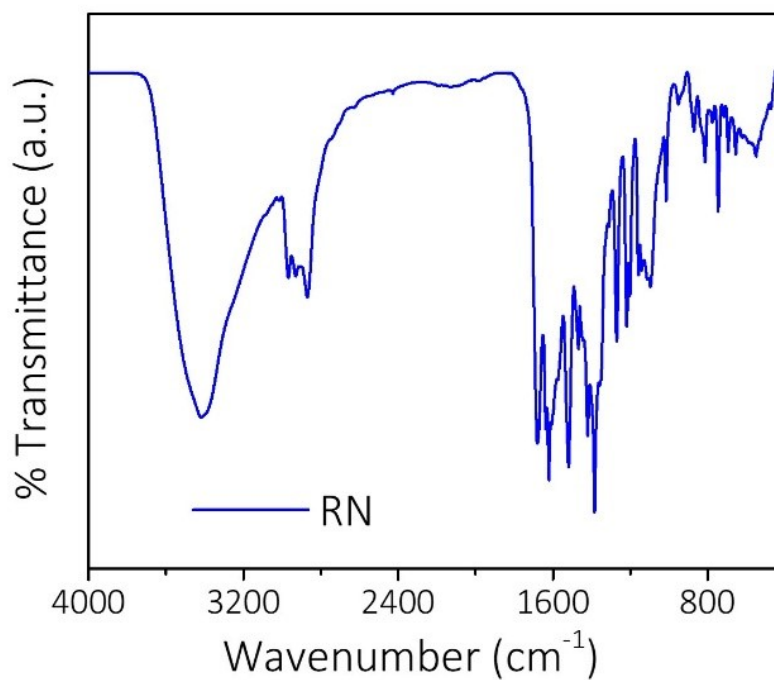

**Figure S2:** FT-IR (KBr pellet) spectrum of RN.

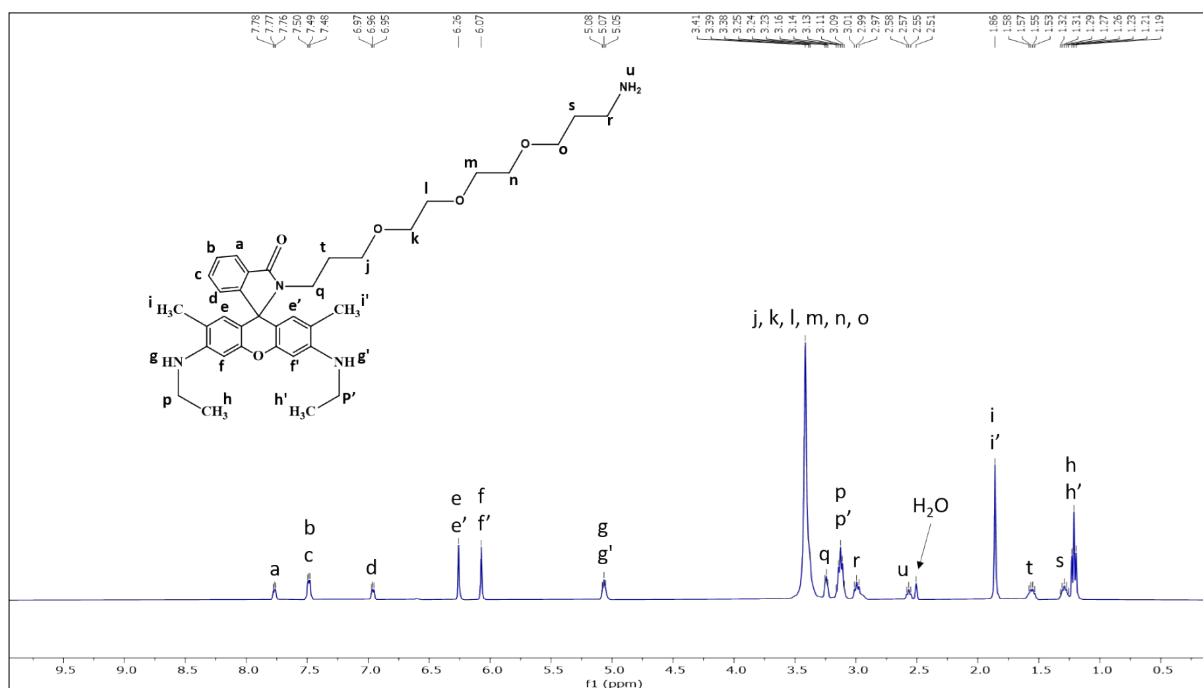

**Figure S3:**  $^1\text{H}$  NMR spectrum of RN in  $\text{DMSO-}d_6$  (400 MHz).

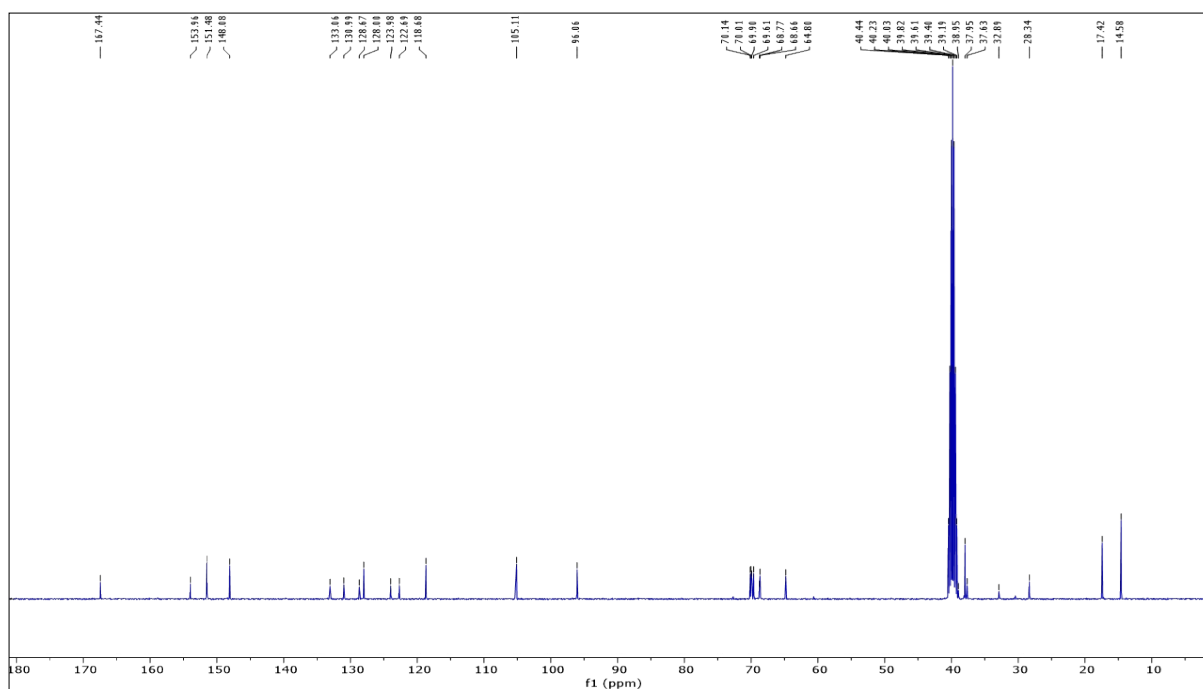

**Figure S4:**  $^{13}\text{C}$  NMR spectrum of RN in  $\text{DMSO-}d_6$  (400 MHz).

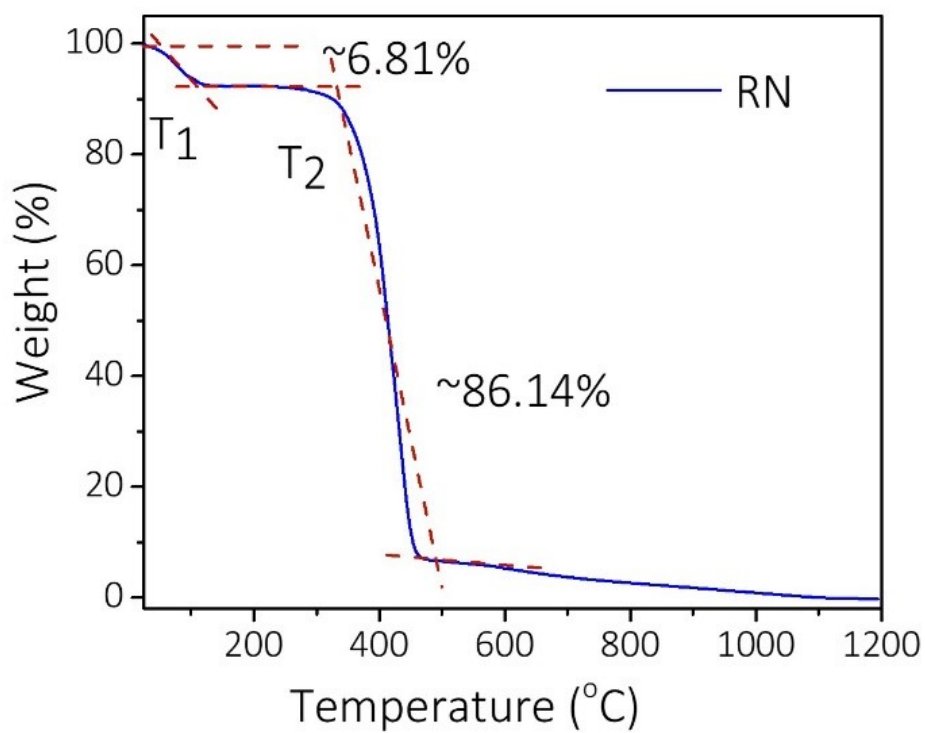

**Figure S5:** Thermogravimetric analysis (TGA) of RN.

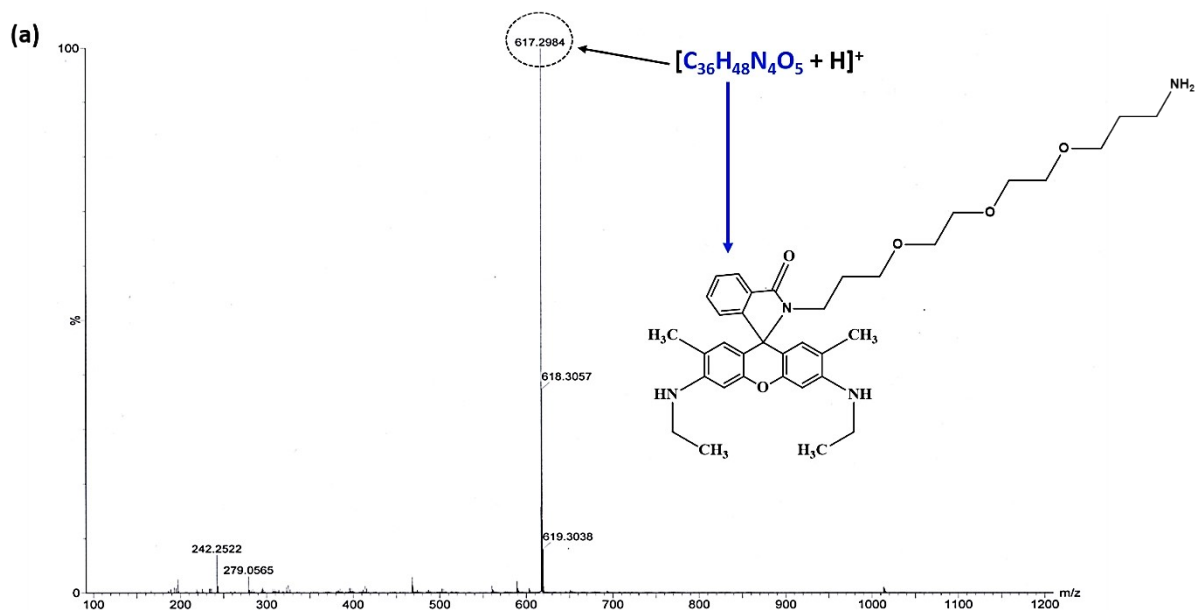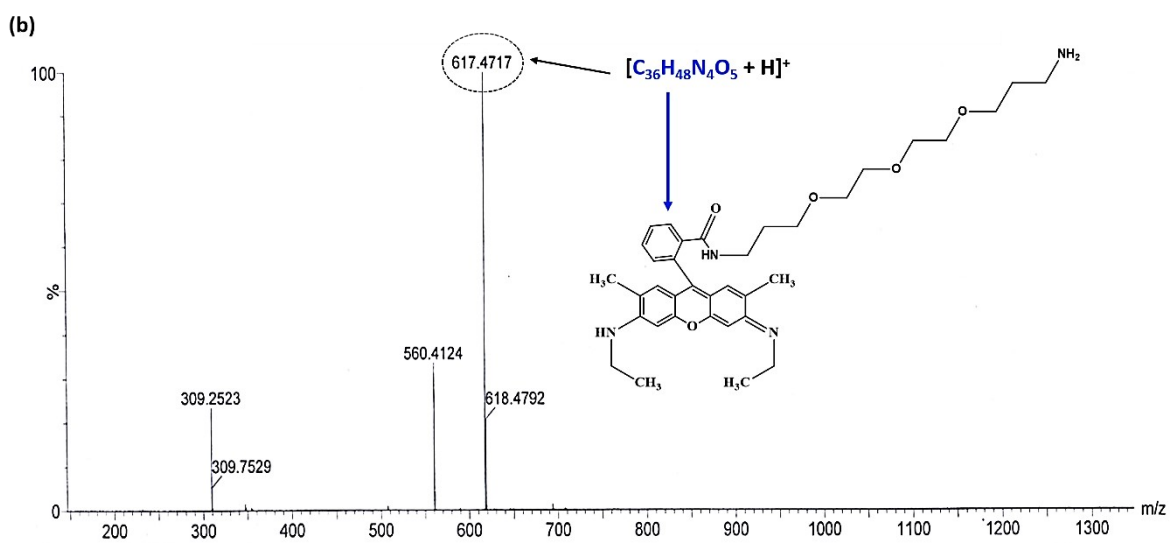

**Figure S6:** (a) ESI-MS spectrum of RN before  $\text{H}_2\text{O}_2$  addition. (b) ESI-MS spectrum of RN after  $\text{H}_2\text{O}_2$  addition.

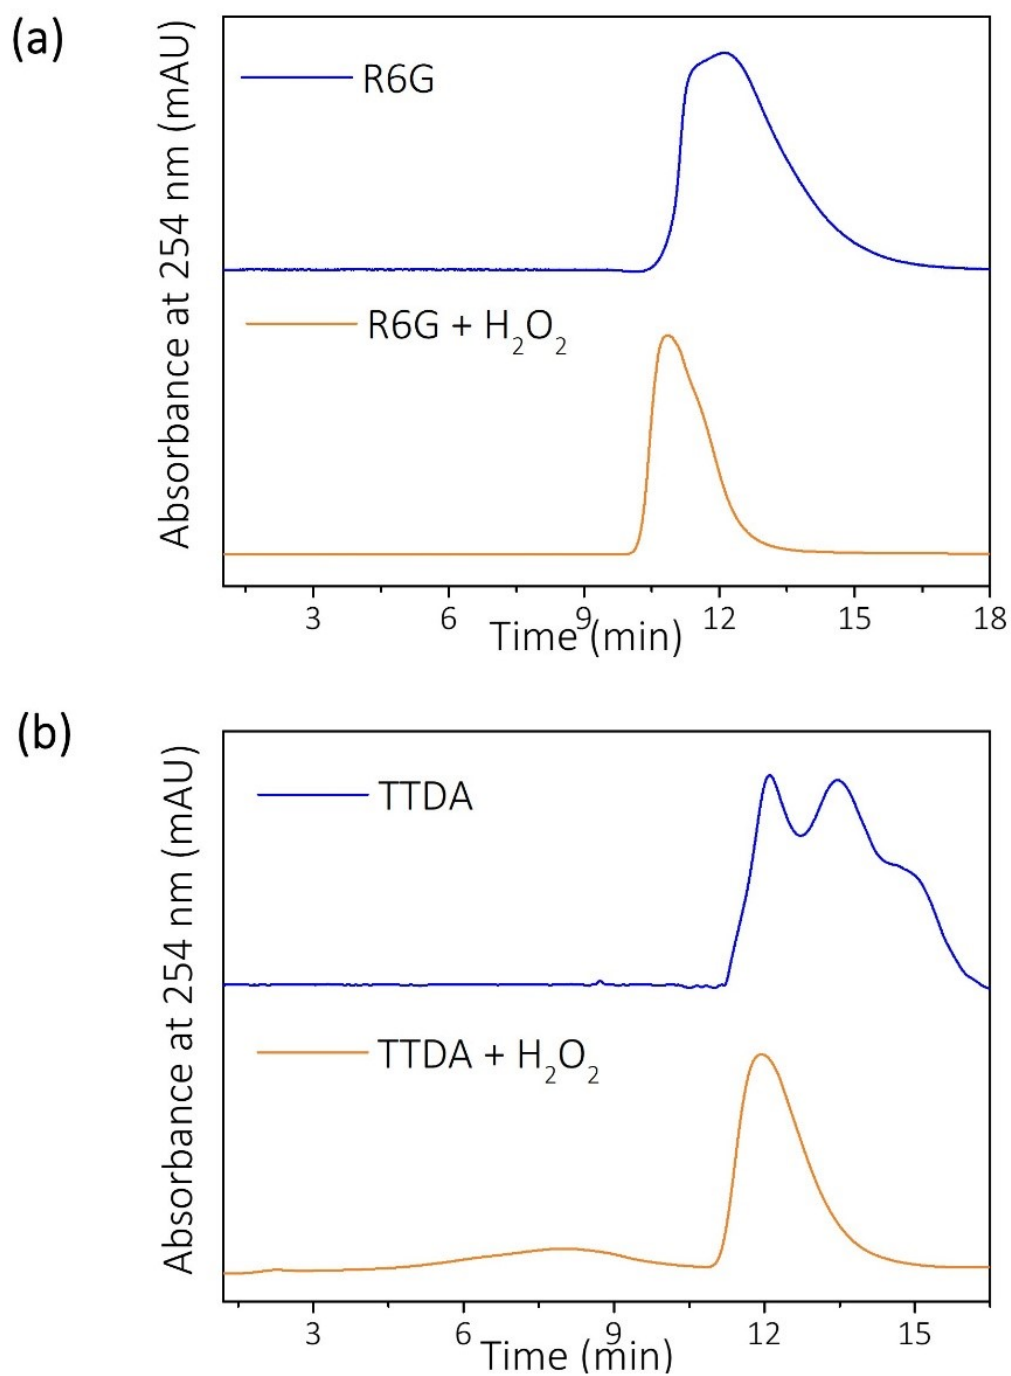

**Figure S7:** HPLC chromatograms of (a) R6G, and (b) TTDA with H<sub>2</sub>O<sub>2</sub> addition (mobile phase water/methanol=70/30).

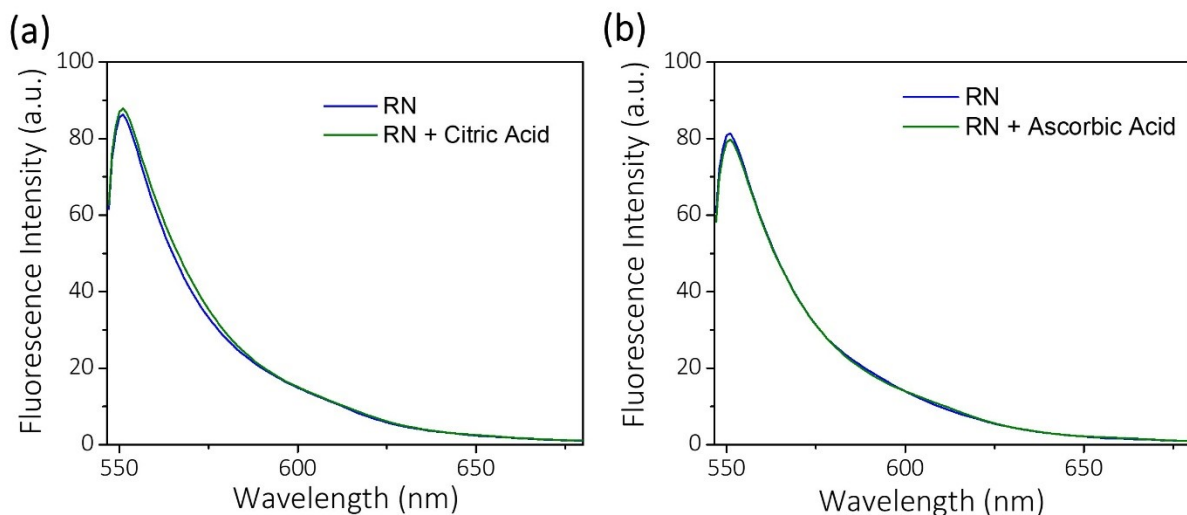

**Figure S8:** Response of RN in the presence of 1 mM of **(a)** Citric Acid (pH~ 2.98) and **(b)** Ascorbic acid (~3.5).

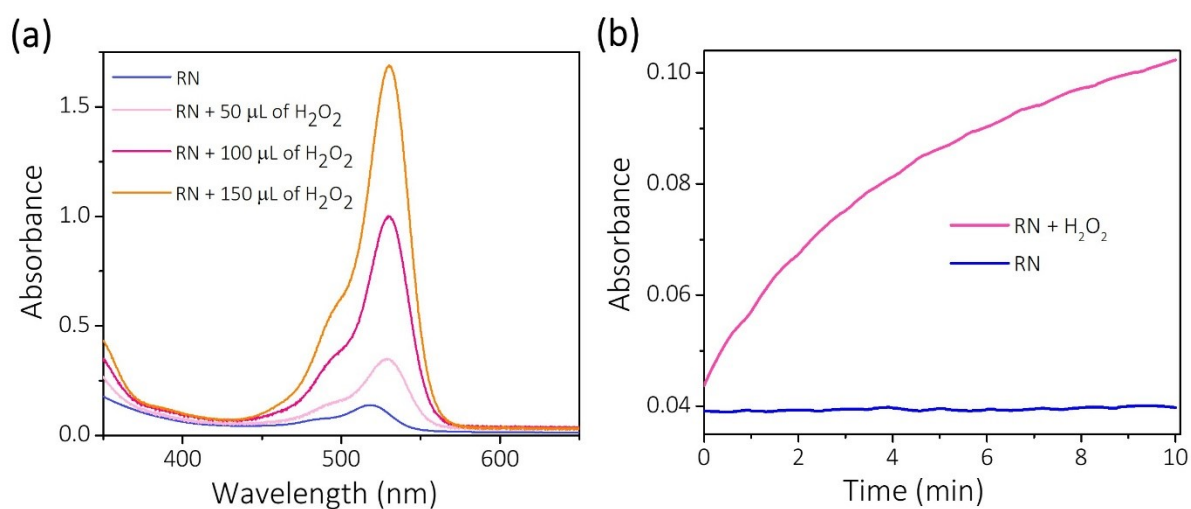

**Figure S9:** **(a)** UV-Vis spectra of RN after the addition of H<sub>2</sub>O<sub>2</sub>. **(b)** Effect of response time on the UV-Vis absorbance of RN at 525 nm at different time intervals.

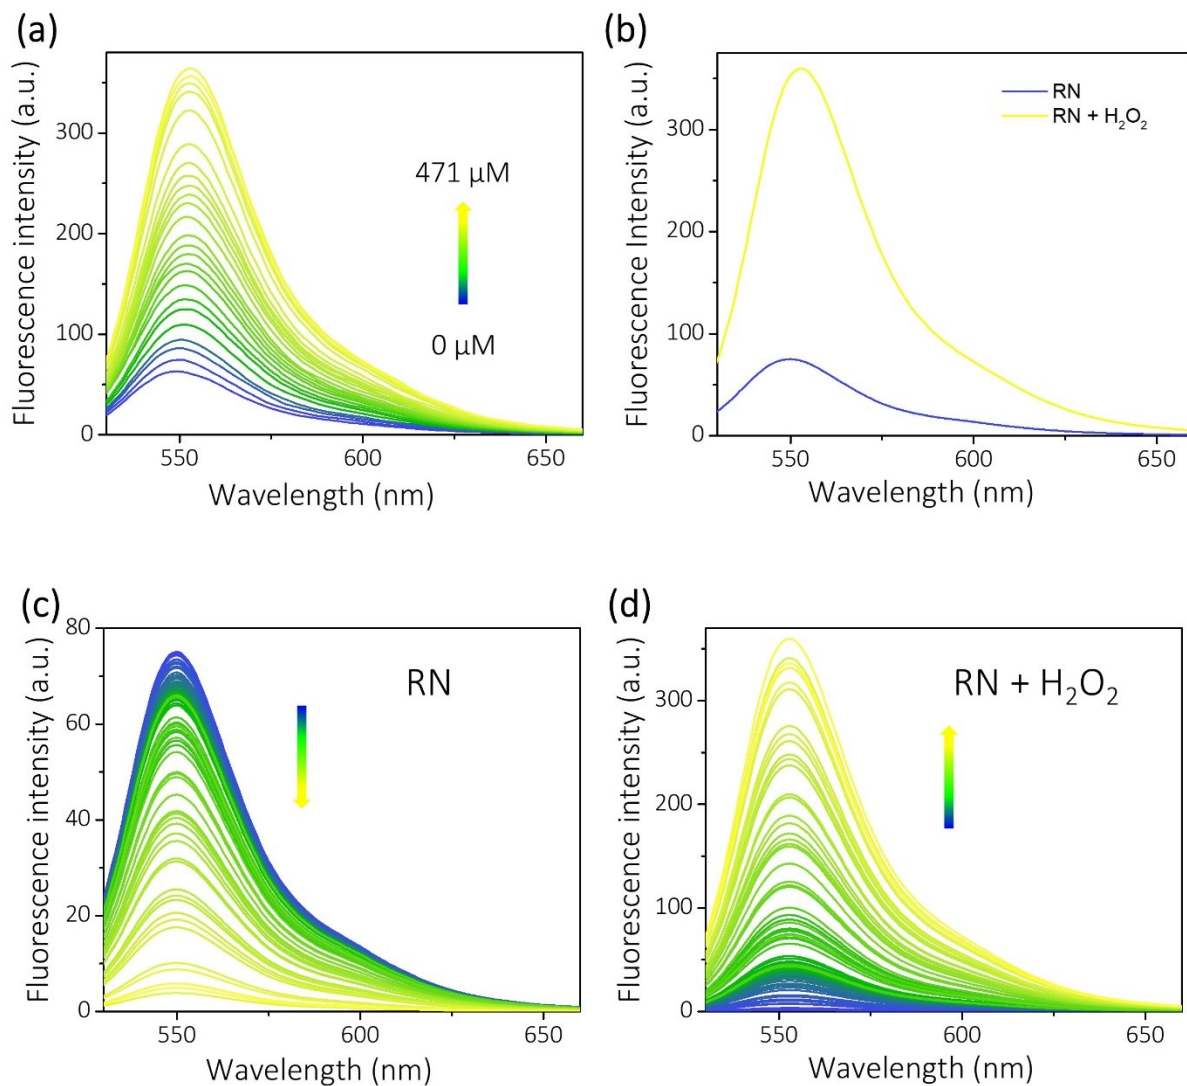

**Figure S10: (a)** Experimental data of fluorescence emission spectra of RN in the presence of different concentrations (0–471  $\mu\text{M}$ ) of  $\text{H}_2\text{O}_2$  ( $\lambda_{\text{ex}}=520\text{ nm}$ ). **(b)** Deconvoluted spectral plot of RN and RN +  $\text{H}_2\text{O}_2$ , showing  $\sim 5\text{ nm}$  peak shifting. Deconvoluted spectra of **(c)** RN and **(d)** RN +  $\text{H}_2\text{O}_2$ .

(Deconvolution method: multivariate curve resolution with evolving factor analysis with non-negative and total closure condition.)

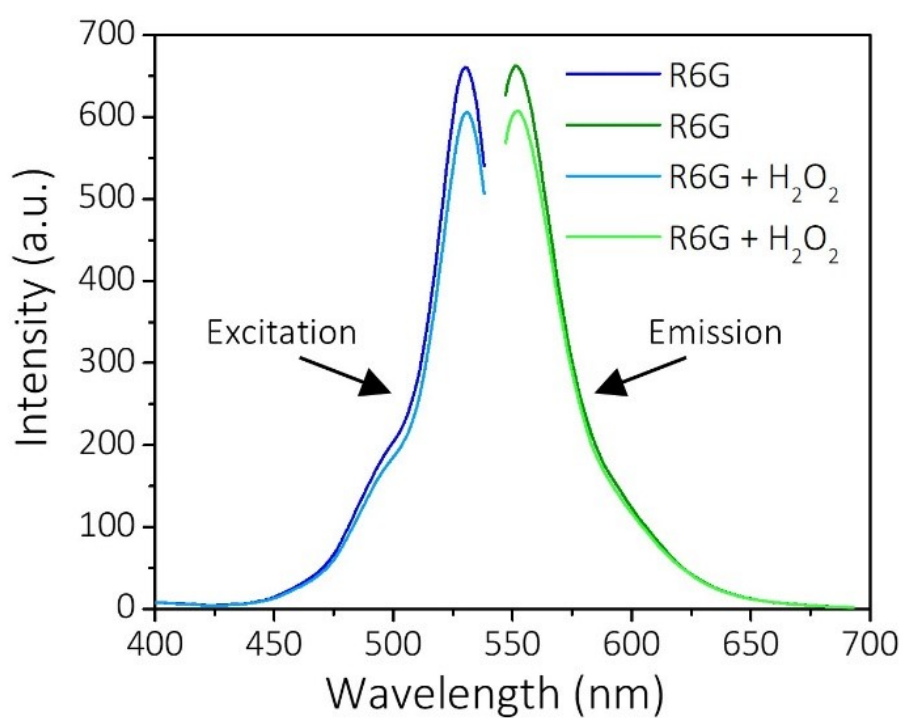

**Figure S11:** Excitation and emission spectra of R6G in ethanol after the addition of 1 mM of  $\text{H}_2\text{O}_2$ .

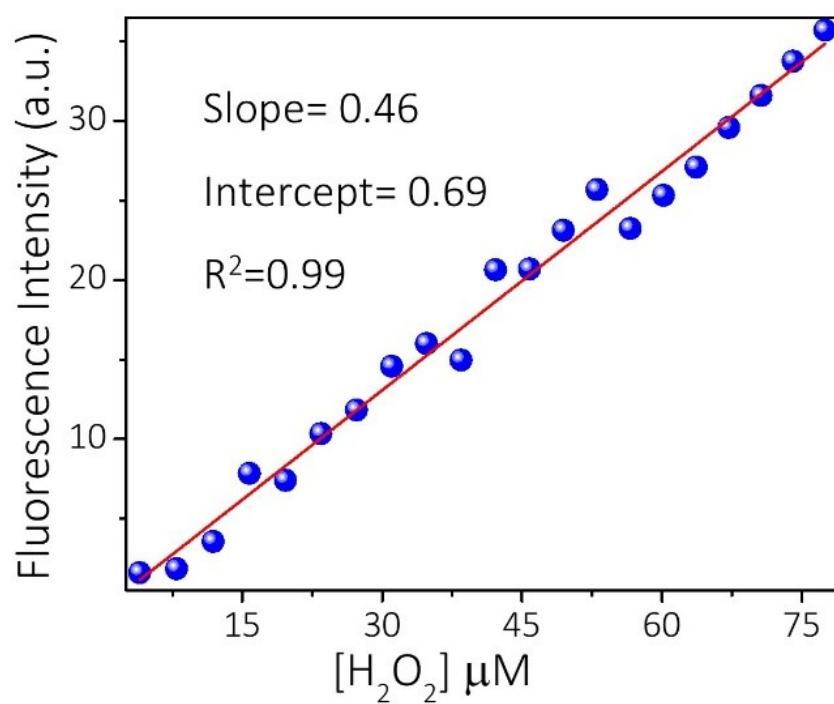

**Figure S12:** Deconvoluted fluorescence intensity of RN at 555 nm as a function of  $\text{H}_2\text{O}_2$  concentrations (3.98–77.49  $\mu\text{M}$ ).

### Preparation of reactive oxygen species (ROS):

Various ROS were prepared using the reported methods.<sup>1-3</sup> The preparation is briefly described below. All the solutions were freshly prepared every time and further diluted as per the requirements.

**H<sub>2</sub>O<sub>2</sub>**: The concentration of H<sub>2</sub>O<sub>2</sub> was obtained based on the optical density at 240 nm with a molar extinction coefficient of 43.6 M<sup>-1</sup> cm<sup>-1</sup>. Then, the required concentration of H<sub>2</sub>O<sub>2</sub> was prepared by appropriately diluting it with deionised water.

**OCl<sup>-</sup>**: This solution was prepared by diluting sodium hypochlorite (NaOCl) appropriately in deionised water. The concentration of OCl<sup>-</sup> was determined based on the optical density at 290 nm with molar extinction coefficient of 350 M<sup>-1</sup> cm<sup>-1</sup>.

**NO<sub>2</sub><sup>-</sup>**: It was prepared by dissolving commercially available NaNO<sub>2</sub> in deionised water.

**TBHP**: It was prepared by diluting commercially available tert-butyl hydroperoxide (TBHP).

**OH<sup>•</sup>**: It was generated by the Fenton reaction by using the same concentration of iron sulfate (FeSO<sub>4</sub>) solution and H<sub>2</sub>O<sub>2</sub>. The concentration of OH<sup>•</sup> depends on the Fe<sup>2+</sup> concentration.

**O<sub>2</sub><sup>•-</sup>**: It was prepared from potassium superoxide (KO<sub>2</sub>)

**<sup>1</sup>O<sub>2</sub>**: It was generated in situ from ClO<sup>-</sup> and H<sub>2</sub>O<sub>2</sub>.

**ONOO<sup>-</sup>**: 0.6 M HCl was added to a reaction mixture of 0.6 M NaNO<sub>2</sub> and 0.6 M H<sub>2</sub>O<sub>2</sub>. Then 1.5 M of NaOH was added to it immediately. The concentration was determined based on the optical density at 300 nm with a molar extinction coefficient of 1670 M<sup>-1</sup> cm<sup>-1</sup>.

### Calculation of Quantum yield

Quantum yields of RN in the absence and presence of H<sub>2</sub>O<sub>2</sub> were estimated with respect to rhodamine 6G in ethanol as a standard. The concentrations of solutions used for the standard and RN were 10 μM. The fluorescence quantum yield ( $\varphi$ ) has been calculated as follows<sup>4</sup>

$$\varphi_{\text{sample}} = \varphi_{\text{reference}} \times \frac{I_{\text{reference}}}{I_{\text{sample}}} \times \frac{A_{\text{sample}}}{A_{\text{reference}}} \times \frac{n_{\text{sample}}^2}{n_{\text{reference}}^2}$$

Where  $\varphi_{\text{sample}}$  is for the quantum yield of RN in the absence and presence of H<sub>2</sub>O<sub>2</sub>.  $\varphi_{\text{reference}}$  is the quantum yield of standard and here the value is 0.95.  $I$  represents integrated intensities (areas) of

sample and standard spectra (in units of photons);  $A$  is the optical density and  $n$  stands for the refractive indices of the sample and reference solution.

The values of  $\varphi$  for RN in the absence and presence of  $\text{H}_2\text{O}_2$  were estimated to be 0.142 and 0.457, respectively.

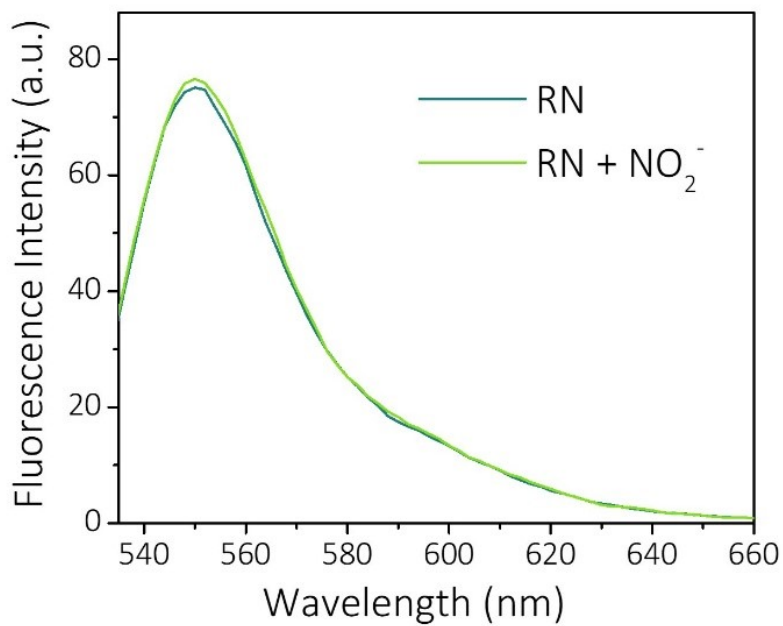

**Figure S13:** 1 mM of  $\text{NaNO}_2$  solution was added to a solution of 10  $\mu\text{M}$  of RN solution and the fluorescence intensity was measured to check the selectivity towards  $\text{NO}_2^-$ .

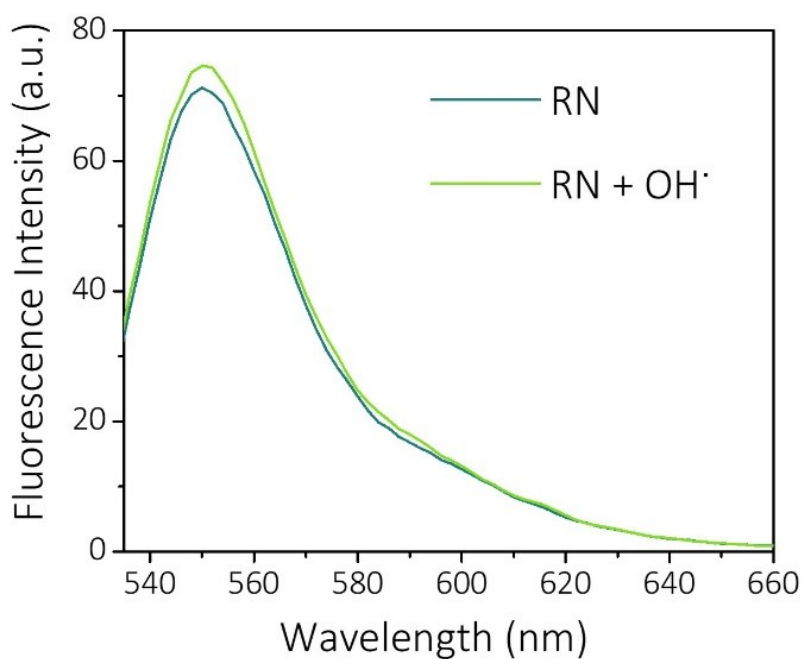

**Figure S14:** 1 mM of OH<sup>•</sup> solution was added to a solution of 10 μM of RN solution and the fluorescence intensity was measured to check the selectivity towards OH<sup>•</sup>.

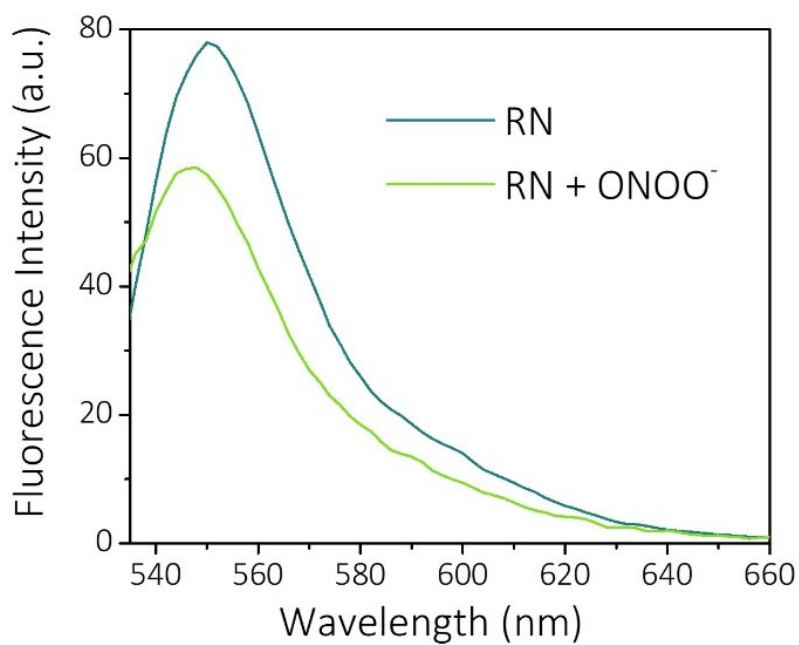

**Figure S15:** 1 mM of ONOO<sup>-</sup> solution was added to a solution of 10 μM of RN solution and the fluorescence intensity was measured to check the selectivity towards ONOO<sup>-</sup>.

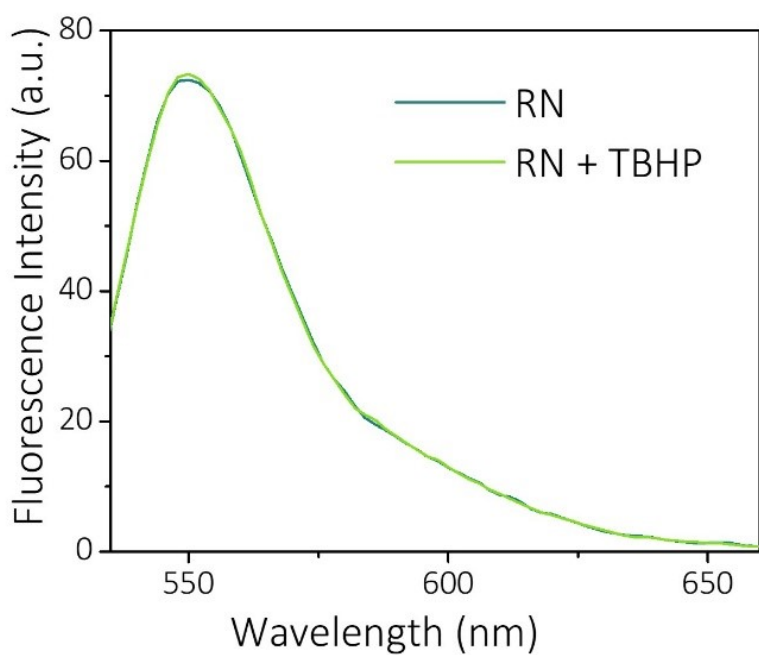

**Figure S16:** 1 mM of  $\text{ONOO}^-$  solution was added to a solution of 10  $\mu\text{M}$  of RN solution and the fluorescence intensity was measured to check the selectivity towards tert-Butyl hydroperoxide (TBHP).

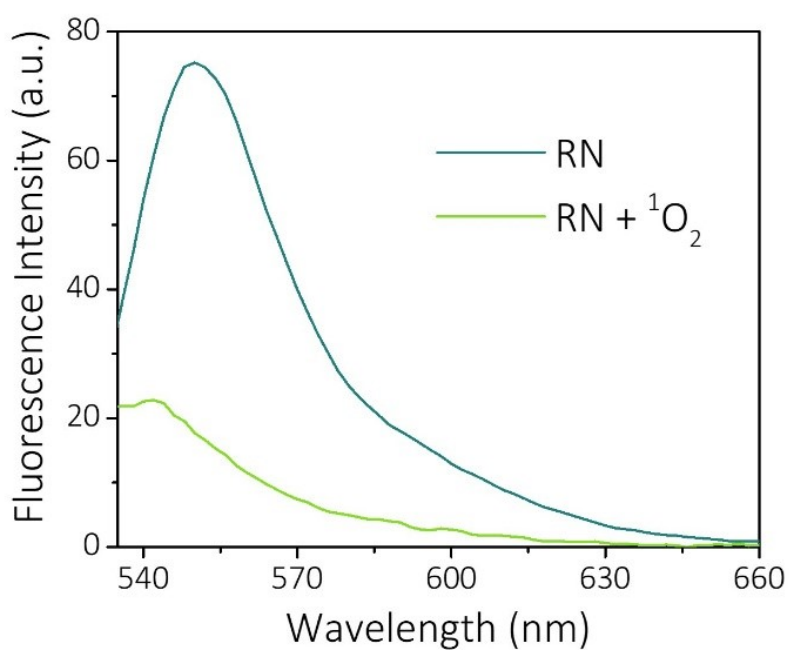

**Figure S17:** 10  $\mu\text{M}$  of RN solution was added with  $^1\text{O}_2$ , generated from NaOCl and  $\text{H}_2\text{O}_2$  and the fluorescence intensity was measured to check the selectivity towards  $^1\text{O}_2$ .

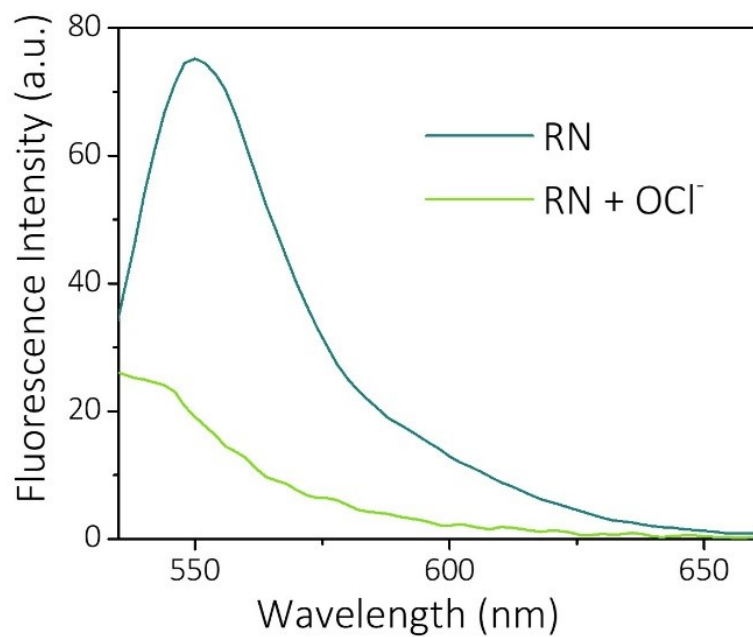

**Figure S18:** 1 mM of NaOCl solution was added to a solution of 10  $\mu$ M of RN solution and the fluorescence intensity was measured to check the selectivity towards ClO<sup>-</sup>.

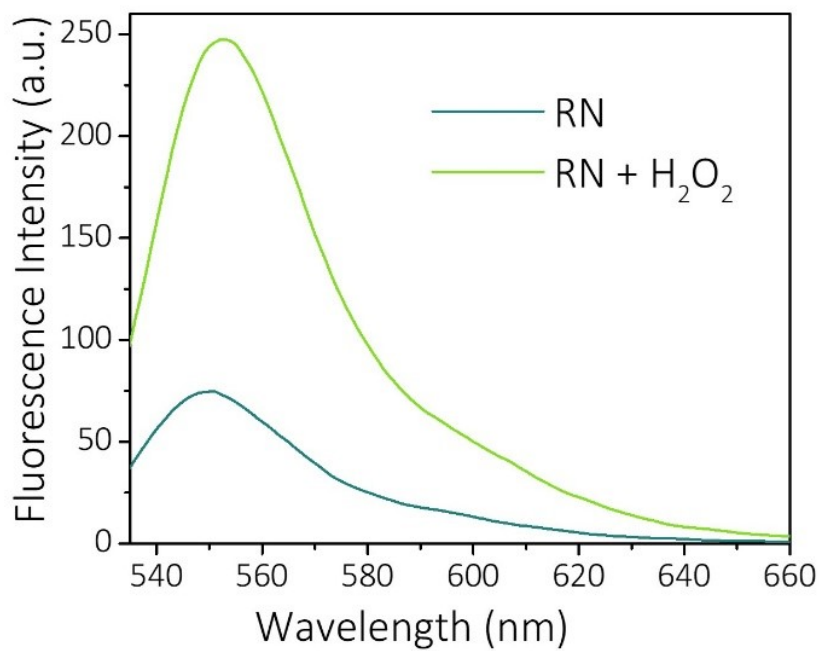

**Figure S19:** 1 mM of H<sub>2</sub>O<sub>2</sub> solution was added to a solution of 10  $\mu$ M of RN solution and the fluorescence intensity was measured towards H<sub>2</sub>O<sub>2</sub>.

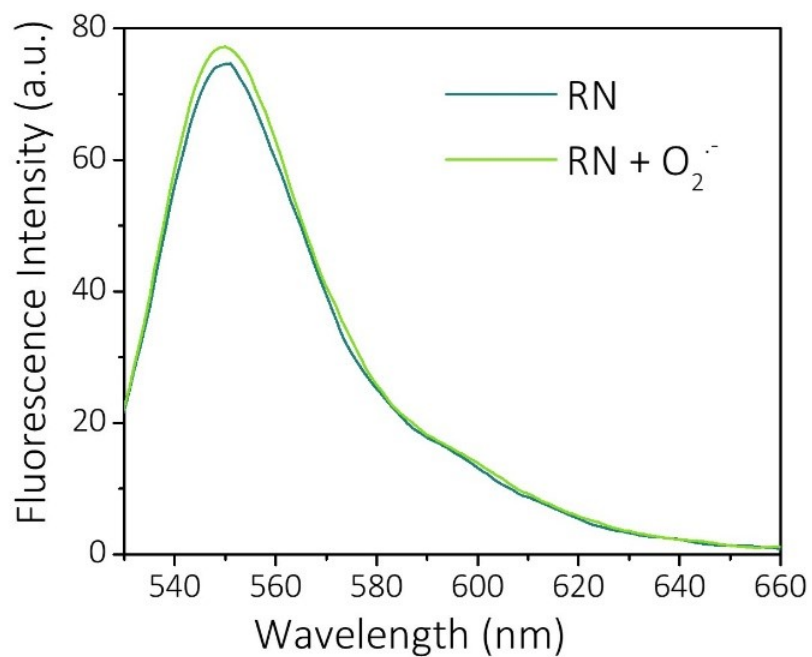

**Figure S20:** 1 mM of O<sub>2</sub><sup>-</sup> solution was added to a solution of 10 μM of RN solution and the fluorescence intensity was measured towards O<sub>2</sub><sup>-</sup>.

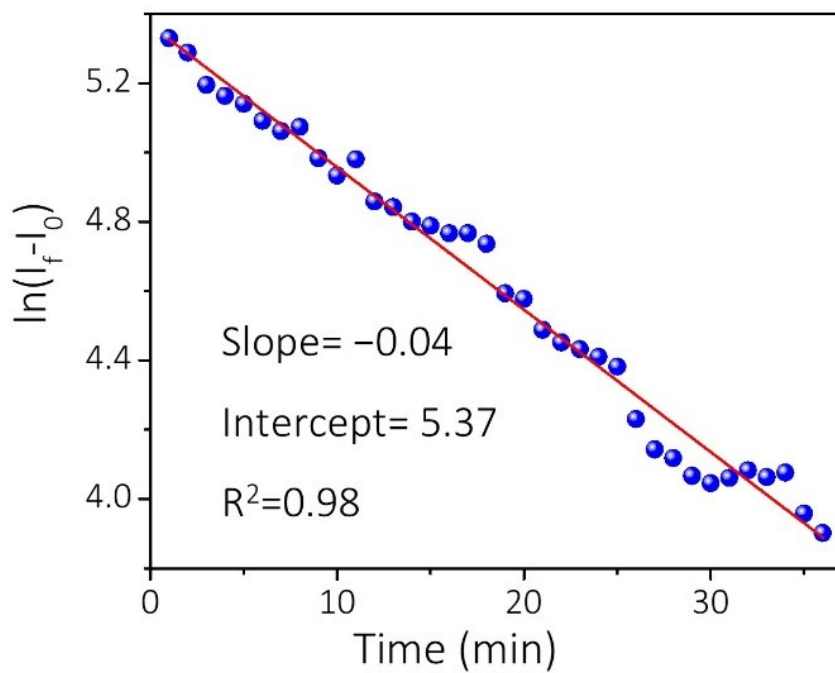

**Figure S21:** Determination of reaction rate constant following pseudo-first order kinetics.

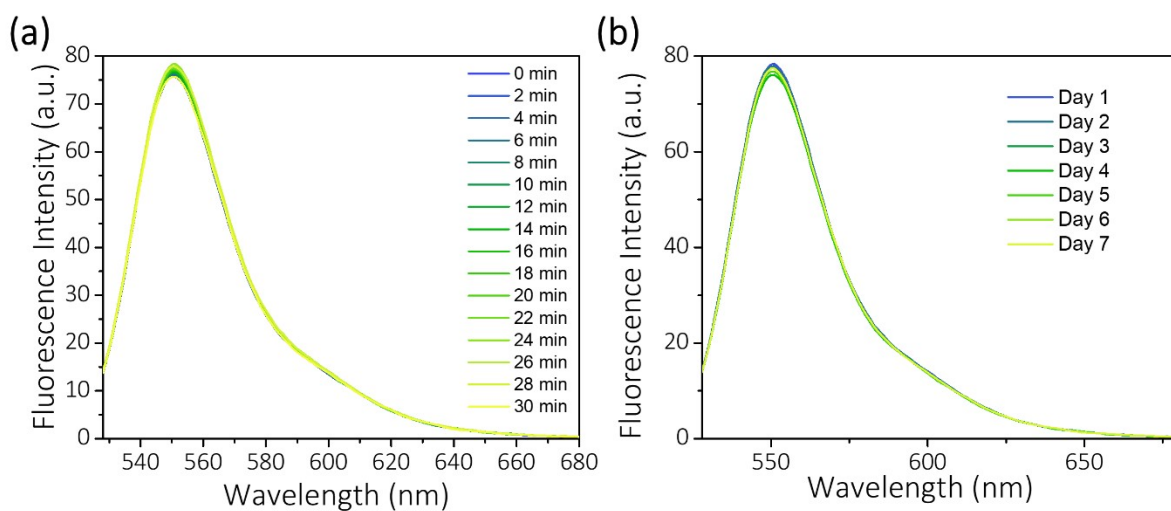

**Figure S22:** Time-dependent fluorescence emission profile of RN (10 μM RN in EtOH) for measuring the photostability: (a) RN over a period of 30 minutes, (b) RN over a period of 7 days.

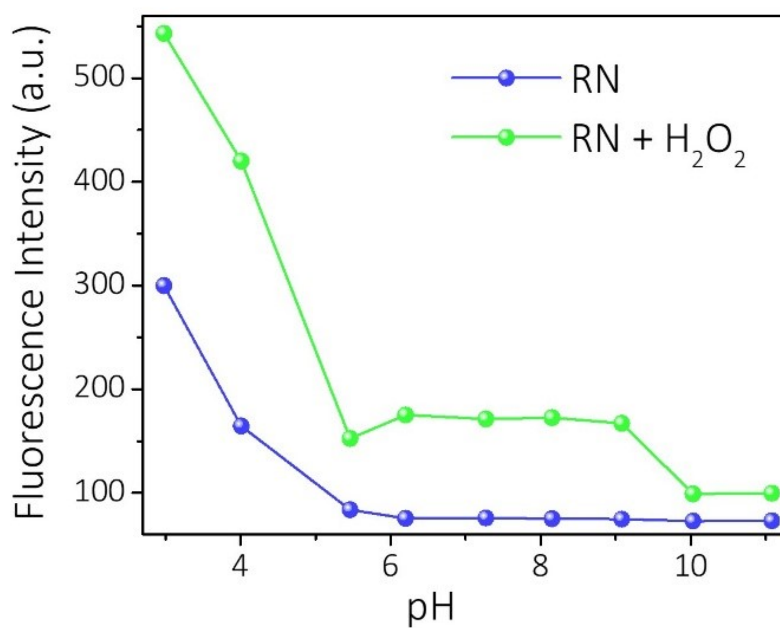

**Figure S23:** Effect of pH on the fluorescence intensity of 10 μM of RN before and after reaction with 500 μM of H<sub>2</sub>O<sub>2</sub>. The pH solutions were prepared using PBS buffer.

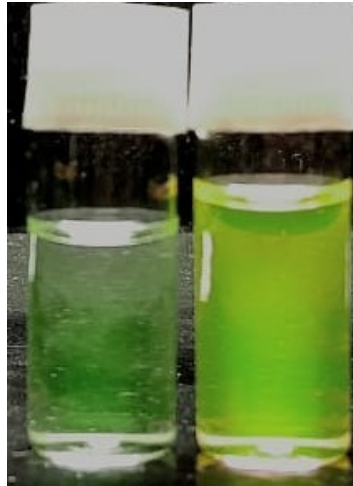

**Figure S24:** The vials containing RN (left) and RN+H<sub>2</sub>O<sub>2</sub> (right) were kept in a UV inspection cabinet and an image was captured by a smartphone (Samsung Galaxy F13) under white light ( $\lambda_{\text{ex}} = 520 \text{ nm}$ ).

*Image captured under UV light before the addition of H<sub>2</sub>O<sub>2</sub>*

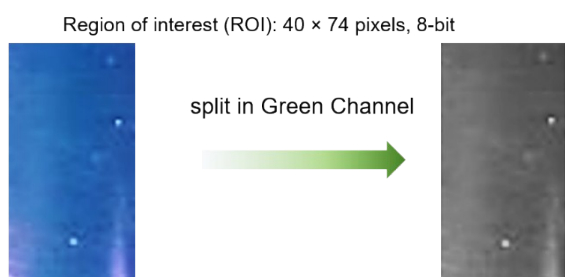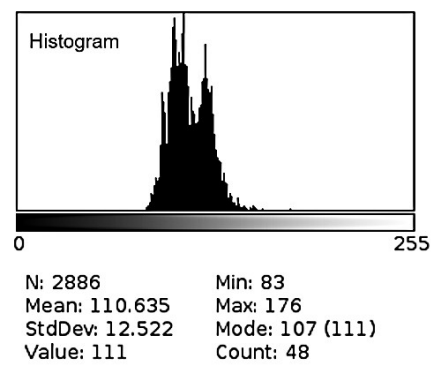

*Image captured under UV light after the addition of H<sub>2</sub>O<sub>2</sub>*

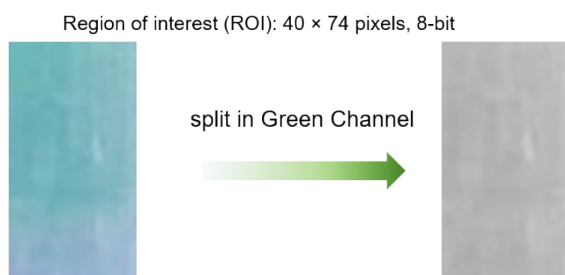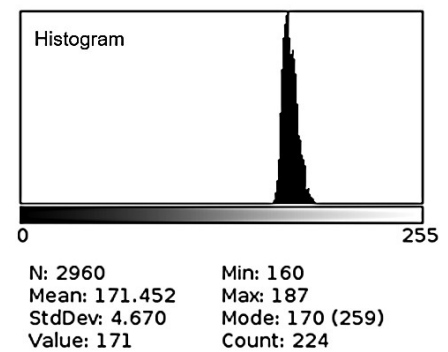

**Figure S25:** Green colour intensity analysis of captured images using ImageJ. Images captured by a smartphone under UV light irradiation.

**Table S1:** Some existing probes along with the newly reported probe RN

| Probe                   | Recognition site    | LOD                              | Response time | Application                                                                                                                             | Ref.      |
|-------------------------|---------------------|----------------------------------|---------------|-----------------------------------------------------------------------------------------------------------------------------------------|-----------|
| GW-1                    | Pentafluoro benzene | –                                | ~30 min       | –                                                                                                                                       | 5         |
| Probe (mentioned as 3a) | Acetyl              | 0.57 $\mu$ M                     | 15 min        | Milk detection and fluorescence imaging of HepG-2 cells and zebrafish                                                                   | 6         |
| 3c                      | Acetyl              | 0.35 $\mu$ M                     | 20 min        | Milk detection and fluorescence imaging of HepG-2 cells and zebrafish                                                                   | 6         |
| CNBE                    | Borate ester        | 1.35 $\times$ 10 <sup>-6</sup> M | 30 min        | exogenous and endogenous H <sub>2</sub> O <sub>2</sub> in living cells and living animals by ratiometric fluorescence imaging           | 7         |
| PR1<br>PF1<br>PX1       | Boronate            | ~100–200 nM                      | 30 min        | Monitoring H <sub>2</sub> O <sub>2</sub> in living cells, including hippocampal neurons                                                 | 8,9       |
| RN                      | –                   | 0.67 ppm                         | ~2 min        | Milk detection and monitoring H <sub>2</sub> O <sub>2</sub> generation in a diabetic L929 skin cell line and diabetic mice liver tissue | This work |

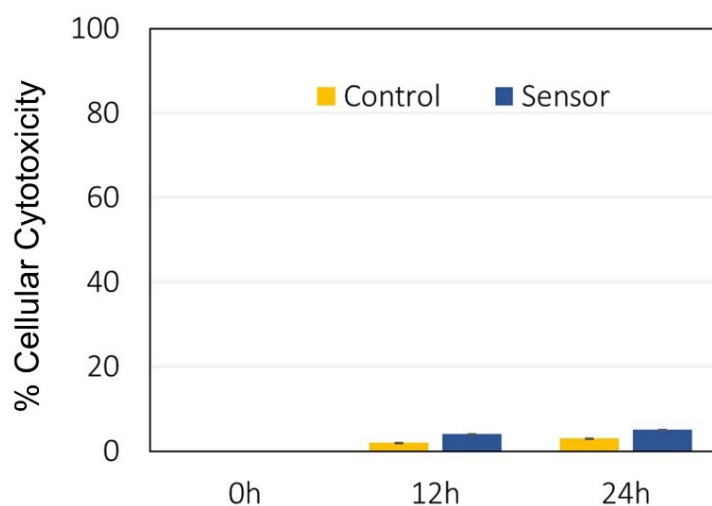

**Figure S26:** Graphical representation of the % cellular cytotoxicity of RN.

## References

- 1 Y. Huang, P. Zhang, M. Gao, F. Zeng, A. Qin, S. Wu and B. Z. Tang, *Chem. Commun.*, 2016, **52**, 7288–7291.
- 2 G. Chen, F. Song, J. Wang, Z. Yang, S. Sun, J. Fan, X. Qiang, X. Wang, B. Dou and X. Peng, *Chem. Commun.*, 2012, **48**, 2949.
- 3 Y. Kong, R. Wu, X. Wang, G. Qin, F. Wu, C. Wang, M. Chen, N. Wang, Q. Wang and D. Cao, *RSC Adv.*, 2022, **12**, 27933–27939.
- 4 J. Hu and C. Zhang, *Anal. Chem.*, 2013, **85**, 2000–2004.
- 5 J. Su, S. Zhang, C. Wang, M. Li, J. Wang, F. Su and Z. Wang, *ACS Omega*, 2021, **6**, 14819–14823.
- 6 T. Peng, S. Ye, R. Liu and J. Qu, *Spectrochim. Acta Part A Mol. Biomol. Spectrosc.*, 2023, **297**, 122757.
- 7 K. Xu, L. He, X. Yang, Y. Yang and W. Lin, *Analyst*, 2018, **143**, 3555–3559.
- 8 E. W. Miller, A. E. Albers, A. Pralle, E. Y. Isacoff and C. J. Chang, *J. Am. Chem. Soc.*, 2005, **127**, 16652–16659.
- 9 M. C. Y. Chang, A. Pralle, E. Y. Isacoff and C. J. Chang, *J. Am. Chem. Soc.*, 2004, **126**, 15392–15393.
